# Supplementary material for: Analysis of Antibiotic Exposure and Early-Onset Neonatal Sepsis in Europe, North America, and Australia
Source: PubMed Central journal article supplement (PMC9685486; doi:10.1001/jamanetworkopen.2022.43691), 2022-11-23
Supplement: jamanetwopen-e2243691-s002.pdf [file jamanetwopen-e2243691-s002.pdf]

\*First name, last name, and suffix (if applicable) are required and will appear in PubMed.

| <b>*Group Name(s): AENEAS Study Group</b> |                   |                              |                  |                                                                                                                                |                                          |                                                         |                                                                                            |
|-------------------------------------------|-------------------|------------------------------|------------------|--------------------------------------------------------------------------------------------------------------------------------|------------------------------------------|---------------------------------------------------------|--------------------------------------------------------------------------------------------|
| <b>*First Name and Middle Initial(s)</b>  | <b>*Last Name</b> | <b>*Suffix (eg, Jr, III)</b> | Academic Degrees | Institution                                                                                                                    | Location (city, state/province, country) | Role or Contribution, eg, chair, principal investigator | Group (if more than 1 Group listed in the byline and/or Subgroup (eg, Steering Committee)) |
| Maria Grazia                              | Capretti          |                              |                  | Neonatal Intensive Care Unit, IRCCS Azienda Ospedaliero-Universitaria di Bologna                                               | Bologna, Italy                           | Participated in data collection                         |                                                                                            |
| Martina                                   | Ceccoli           |                              |                  | Neonatal Intensive Care Unit, Azienda Ospedaliero-Universitaria di Modena                                                      | Modena, Italy                            | Participated in data collection                         |                                                                                            |
| Morena                                    | De Angelis        |                              |                  | Neonatal Intensive Care Unit, Maggiore Hospital                                                                                | Bologna, Italy                           | Participated in data collection                         |                                                                                            |
| Pietro                                    | Drimaco           |                              |                  | Neonatology and Neonatal Intensive Care Unit, Ecclesiastical General Hospital F. Miulli                                        | Acquaviva delle Fonti, Italy             | Participated in data collection                         |                                                                                            |
| Khalyane                                  | Eap               |                              |                  | University of Lausanne                                                                                                         | Lausanne, Switzerland                    | Participated in data collection                         |                                                                                            |
| Zoe                                       | el Helou          |                              |                  | Division of Neonatology, Department of Pediatrics, McMaster Children's Hospital, McMaster University, Hamilton Health Sciences | Hamilton, Canada                         | Participated in data collection                         |                                                                                            |
| Rana                                      | Esmaeilizand      |                              |                  | Division of Neonatology, Department of Pediatrics, McMaster Children's Hospital, McMaster University, Hamilton Health Sciences | Hamilton, Canada                         | Participated in data collection                         |                                                                                            |
| Alessandra                                | Foglianesi        |                              |                  | Neonatologia e Terapia Intensiva Neonatale, University of Bari                                                                 | Bari, Italy                              | Participated in data collection                         |                                                                                            |
| Carmelo                                   | Geraci            |                              |                  | Policlinico Riuniti di Foggia                                                                                                  | Foggia, Italy                            | Participated in data collection                         |                                                                                            |

## Supplemental Online Content: Nonauthor Collaborators

\*First name, last name, and suffix (if applicable) are required and will appear in PubMed.

| *First Name and Middle Initial(s) | *Last Name | *Suffix (eg, Jr, III) | Academic Degrees | Institution                                                                                                                                                | Location (city, state/province, country) | Role or Contribution, eg, chair, principal investigator | Group (if more than 1 Group listed in the byline) and/or Subgroup (eg, Steering Committee) |
|-----------------------------------|------------|-----------------------|------------------|------------------------------------------------------------------------------------------------------------------------------------------------------------|------------------------------------------|---------------------------------------------------------|--------------------------------------------------------------------------------------------|
| Bartłomiej                        | Grochowski |                       |                  | Department of Neonatology and Neonatal Intensive Care Medical University of Warsaw, Poland                                                                 | Warsaw, Poland                           | Participated in data collection                         |                                                                                            |
| Stellan                           | Håkansson  |                       |                  | The Swedish Neonatal Quality Register, Stockholm, Sweden and Department of Clinical Sciences, Pediatrics, Umeå University                                  | Umeå, Sweden                             | Participated in data collection                         |                                                                                            |
| Sharandeep                        | Kaur       |                       |                  | Department of Pediatrics, St Catharines General Hospital, Niagara Health                                                                                   | St Catharines, Canada                    | Participated in data collection                         |                                                                                            |
| Anne-Louise                       | Kollegger  |                       |                  | MACCS Université Catholique de Louvain                                                                                                                     | Louvain, Belgium                         | Participated in data collection                         |                                                                                            |
| Frida                             | Oldendorff |                       |                  | Department of Neonatology, Karolinska University Hospital and Department of Clinical Science, Intervention and Technology (CLINTEC), Karolinska Institutet | Stockholm, Sweden                        | Participated in data collection                         |                                                                                            |
| Vittoria                          | Rizzo      |                       |                  | Terapia Intensiva Neonatale Ospedale M.Bufalini Cesena                                                                                                     | Cesena, Italy                            | Participated in data collection                         |                                                                                            |
| Arild E.                          | Rønnestad  |                       |                  | Medical faculty, Institute for clinical medicine, University of Oslo                                                                                       | Oslo, Norway                             | Participated in data collection                         |                                                                                            |
| Damber                            | Shrestha   |                       |                  | Neonatal Directorate, Child and Adolescent Health Service, King Edward Memorial Hospital                                                                   | Perth, Western Australia                 | Participated in data collection                         |                                                                                            |
| Hans Jørgen                       | Stensvold  |                       |                  | Department of Neonatal Intensive Care, Clinic of Paediatric and Adolescent Medicine, Oslo University Hospital                                              | Oslo, Norway                             | Participated in data collection                         |                                                                                            |

## Supplemental Online Content: Nonauthor Collaborators

\*First name, last name, and suffix (if applicable) are required and will appear in PubMed.

| *First Name and Middle Initial(s) | *Last Name  | *Suffix (eg, Jr, III) | Academic Degrees | Institution                                                                                                                          | Location (city, state/province, country) | Role or Contribution, eg, chair, principal investigator | Group (if more than 1 Group listed in the byline) and/or Subgroup (eg, Steering Committee) |
|-----------------------------------|-------------|-----------------------|------------------|--------------------------------------------------------------------------------------------------------------------------------------|------------------------------------------|---------------------------------------------------------|--------------------------------------------------------------------------------------------|
| Anaïs                             | Torregrossa |                       |                  | Department Mother-Woman-Child, Lausanne University Hospital and University of Lausanne                                               | Lausanne, Switzerland                    | Participated in data collection                         |                                                                                            |
| Martin                            | Trefny      |                       |                  | Department of Obstetrics and Gynecology, Neonatal unit, Motol University Hospital and Second Faculty of Medicine, Charles University | Prague, Czech Republic                   | Participated in data collection                         |                                                                                            |
| Kristyna                          | Zilinska    |                       |                  | Department of Neonatology, Thomayer Hospital Prague                                                                                  | Prague, Czech Republic                   | Participated in data collection                         |                                                                                            |
| Aleksandra                        | Zwijacz     |                       |                  | Department of Neonatology and Neonatal Intensive Care Medical University of Warsaw                                                   | Warsaw, Poland                           | Participated in data collection                         |                                                                                            |
